# Supplementary material
Source: Springer Nature journal article supplement (https://www.springermedizin.de/resource/supplementary/12955_2008_547_MOESM1_ESM.pdf/9560678)
Supplement: MOESM1 [file 9560678]

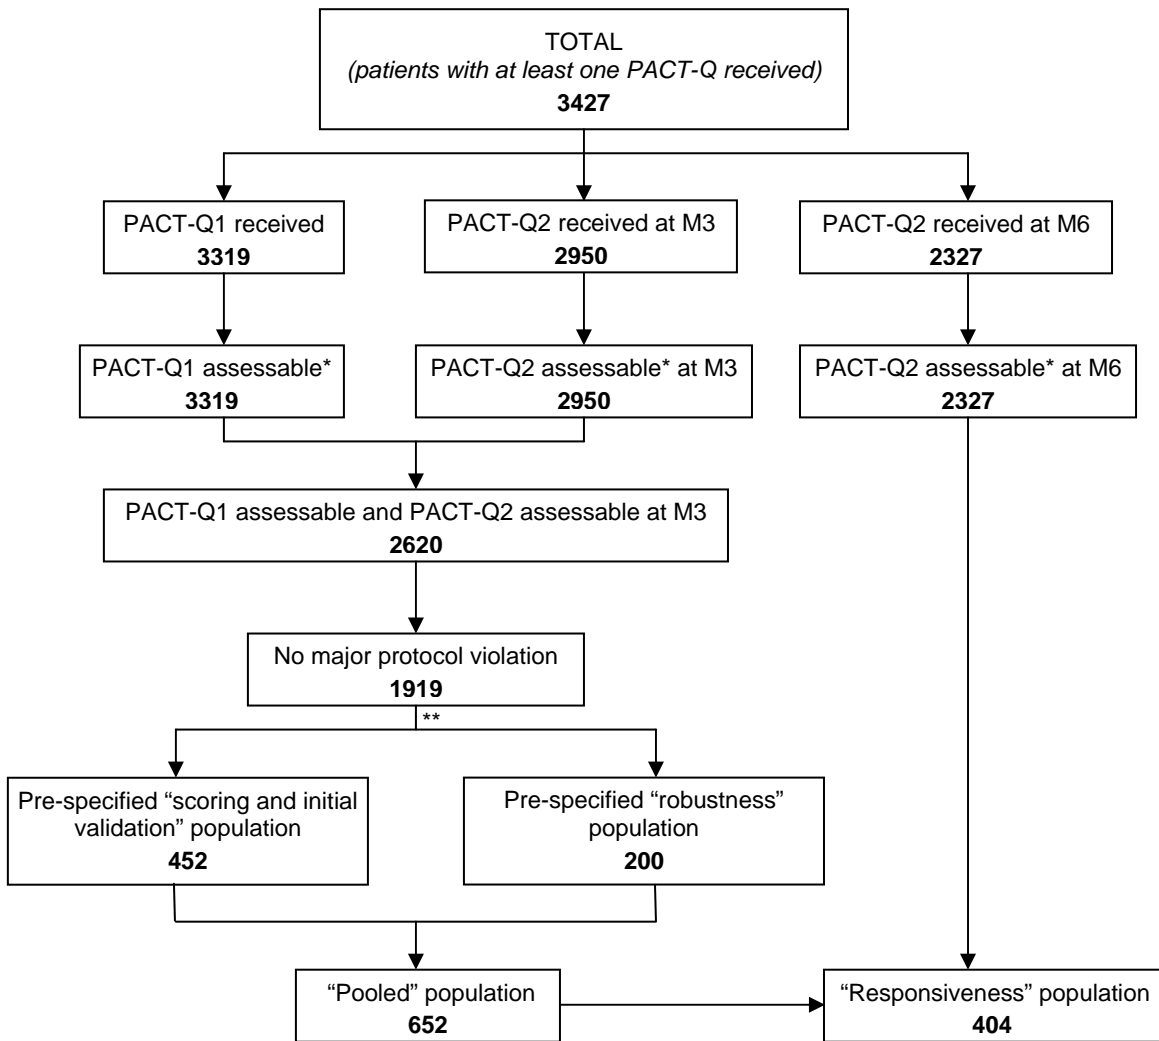

\*At least 50% of the items are completed

\*\*Patients from the United States, the Netherlands and France only; remaining patients were used for treatment effect analyses (manuscript in preparation)
